# Supplementary material for: Uncovering the Connectivity Logic of the Ventral Tegmental Area
Source: Front Neural Circuits. 2022 Jan 28;15:799688. doi: 10.3389/fncir.2021.799688 (PMC8832514; doi:10.3389/fncir.2021.799688)
Supplement: Supplementary file 1 [file Table_1.xlsx]

## Sheet: Sheet1
Table S1: Allen Mouse Connectivity Atlas experiment IDs.
IDs for experiments used from the Allen Mouse Connectivity Atlas.
Input	Exp ID	Exp ID	Exp ID
Orb	167902586	287769286	180709230
IL and PL	263106036	157711748	286313491
NAcMed	168614604	170785775	168615344
NAcCore	175373569	168615344	167904966
VP	159650350	138058320	147632458
PO	113554719	146470726	113553300
Septum	100141597	125830911	267810394
BNST	147049515	117312486	127909584
EAM	175072921	175372863	180981417
GPe	511942270	158373958
PVH	181057754	175106053	180674463
LHb	267494468	147353537	272875838
MHb	268321927	300236056	300843826
CeA	146795148	265648940	127761449
LH	158258062	113313632	113313632
ZI	126190743	113095845	175018829
DR	114155190	128055110	480074702
LDT	158434409	158435826	128002057
PBN	268415561	127469566	147635309
DCN	120493315	268389532	156872043
DStr	112458831	148198052	146553266
EP	305024724
Can view experiments at the following URLs, by replacing <ID> with the Exp IDs above
cortical slices	https://connectivity.brain-map.org/projection/experiment/cortical_map/<ID>
experiment summary	https://connectivity.brain-map.org/projection/experiment/<ID>
